# Supplementary material
Source: MDPI journal article supplement (https://www.mdpi.com/1660-4601/11/2/2218)
Supplement: s1 [file s1]

## Indicators for Tracking European Vulnerabilities to the Risks of Infectious Disease Transmission due to Climate Change

**Table S1.** Conceptual framework for adaptive capacity.

| Aggregate Dimension of Adaptive Capacity from ESPON [1] | Fit with Variables Identified in [2]                                                                     | Fit with Variables Identified in [3]                                 |
|---------------------------------------------------------|----------------------------------------------------------------------------------------------------------|----------------------------------------------------------------------|
| Awareness                                               | literacy rate among 15–25 year olds<br>literacy ratio (female to male)                                   | high access to information                                           |
| Ability                                                 | Population with access to sanitation<br>caloric intake<br>life expectancy at birth<br>maternal mortality | universal health care coverage                                       |
| Action                                                  | voice and accountability<br>civil liberties<br>political rights                                          | <i>per capita</i> income<br>inequality in the distribution of income |

### References

1. Few, R. Health and climatic hazards: Framing social research on vulnerability, response and adaptation. *Glob. Environ. Change* **2007**, *17*, 281–295.
2. McMichael, A.J. Globalization, climate change, and human health. *N. Engl. J. Med.* **2013**, *368*, 1335–1343.
3. Bowen, K.J.; Ebi, K.; Friel, S.; McMichael, A.J. A multi-layered governance framework for incorporating social science insights into adapting to the health impacts of climate change. *Glob. Health Action* **2013**, *6*, doi:10.3402/gha.v6i0.21820.

© 2014 by the authors; licensee MDPI, Basel, Switzerland. This article is an open access article distributed under the terms and conditions of the Creative Commons Attribution license (<http://creativecommons.org/licenses/by/3.0/>).
